# Supplementary material for: The m6A methyltransferase METTL3 affects autophagy and progression of nasopharyngeal carcinoma by regulating the stability of lncRNA ZFAS1
Source: PubMed Central journal article supplement (PMC8722091; doi:10.1186/s13027-021-00411-1), 2022-01-03
Supplement: 13027_2021_411_MOESM5_ESM.pdf [file 13027_2021_411_MOESM5_ESM.pdf]

**Table S1. The relationship between lncRNA-ZFAS1 expression and clinicopathological characteristics in nasopharyngeal carcinoma**

| Items                       | Characteristic | Data (N=53) | ZFAS1 expression |      | P value        |
|-----------------------------|----------------|-------------|------------------|------|----------------|
|                             |                |             | low              | high |                |
| Gender                      | Male           | 30          | 14               | 16   | 0.7846         |
|                             | Female         | 23          | 12               | 11   |                |
| Age                         | <50            | 13          | 8                | 5    | 0.3520         |
|                             | ≥50            | 40          | 18               | 22   |                |
| Histological classification | NKC            | 13          | 7                | 6    | 0.7570         |
|                             | KSCC           | 40          | 19               | 21   |                |
| T stage                     | T1–T2          | 28          | 18               | 10   | <b>0.0281*</b> |
|                             | T3–T4          | 25          | 8                | 17   |                |
| TNM stage                   | I–II           | 24          | 16               | 8    | <b>0.0281*</b> |
|                             | III–IV         | 29          | 10               | 19   |                |
| Relapse                     | Yes            | 43          | 19               | 24   | 0.1751         |
|                             | No             | 10          | 7                | 3    |                |

Note: \* $P < 0.05$  was recognized as a significant difference.

Abbreviations: TNM, tumor node metastasis.

**Table S2. Primer sequence**

| <b>Gene</b>        | <b>Primer Sequence</b>           |
|--------------------|----------------------------------|
| miR-100-3p forward | 5'- TCGTTCGCTCAAGCTTGTATCTA -3 ' |
| miR-100-3p reverse | 5'- TATGGTTGTTACCTCTCGTTCAC -3'  |
| U6 forward         | 5'-CTCGCTTCGGCAGCACATA-3'        |
| U6 reverse         | 5'-AACGATTCACGAATTTGCGT-3'       |
| ATG10 forward      | 5'- AGACCATCAAAGGACTGTTCTGA-3'   |
| ATG10 reverse      | 5'- GGGTAGATGCTCCTAGATGTGA-3'    |
| METTL3 forward     | 5'- CCCGCGGATATTCACATGGAAGTCC-3' |
| METTL3 reverse     | 5'- TGGGGCAGCCATCACAAGTCAAAC-3'  |
| E-cadherin forward | 5'-ATTTTTCCCTCGACACCCGAT-3'      |
| E-cadherin reverse | 5'-TCCCAGGCGTAGACCAAGA-3'        |
| N-cadherin forward | 5'-GAGAGGAAGACCA-GGACTATGA-3'    |
| N-cadherin reverse | 5'-CAGTCATCACCACCACATAC-3'       |
| Vimentin forward   | 5'-AGTCCACTGAGTACCGGAGAC-3'      |
| Vimentin reverse   | 5'-CATTTCACGCATCTGGCGTTC-3'      |
| Beclin1 forward    | 5'-GGCCAATAAGATGGGTCTGA-3'       |
| Beclin1 reverse    | 5'-GCTGCACACAGTCCAGAAAA-3'       |
| P62 forward        | 5'-TGTGGAACATGGAGGGAAG-3'        |
| P62 reverse        | 5'-TGTGCCTGTGCTGGAAGTTTC-3'      |
| LC3 forward        | 5'-TTGGTCAAGATCATCCGGC-3'        |
| LC3 reverse        | 5'-GCTCACCATGCTGTGCTGG-3'        |
| ZFAS1 forward      | 5'- GCTATTGTCCTGCCCCGTTAG -3'    |
| ZFAS1 reverse      | 5'- TCGTCAGGAGATCGAAGGTT -3'     |
| GAPDH forward      | 5'-GAAGGTGAAGGTCGGAGTC-3'        |
| GAPDH reverse      | 5'-GAAGATGGTGTGGGATTC-3'         |
